# Supplementary material
Source: PubMed Central journal article supplement (PMC3760052)
Supplement: Supp_Fig2.pdf [file Supp_Fig2.pdf]

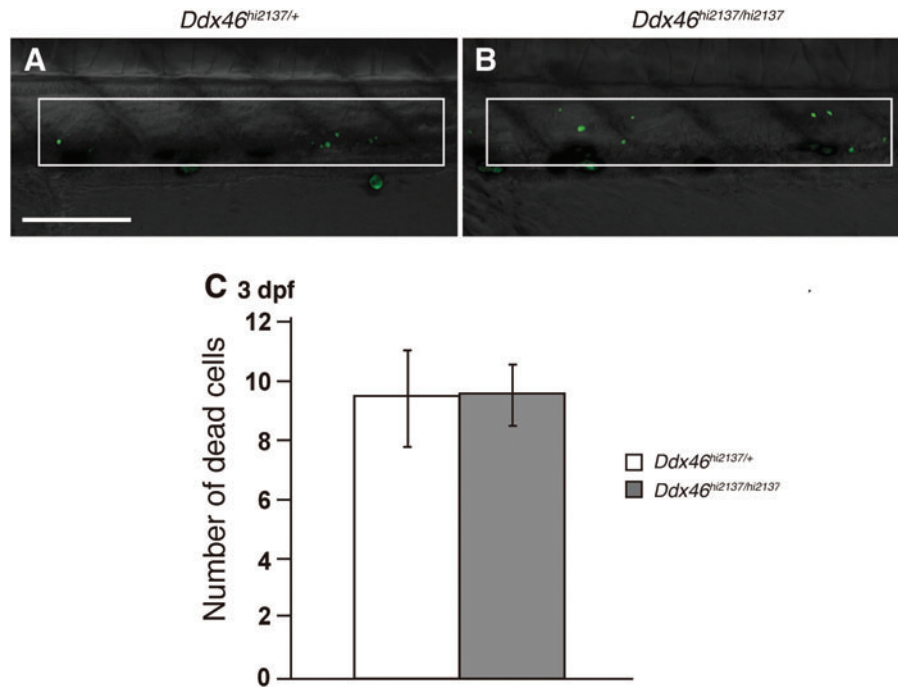

**SUPPLEMENTARY FIG. S2.** Upregulation of cell death is not detected in the CHT of  $Ddx46^{hi2137/hi2137}$  mutants. **(A, B)** Confocal microscopic images of dead cells (*green*) detected by acridine orange staining at 3 dpf. All are lateral views, anterior to the *left*. The *white, boxed regions* show an area of the CHT. **(C)** The number of dead cells in  $Ddx46^{hi2137/hi2137}$  larvae ( $n=6/6$ ) was not higher than in  $Ddx46^{hi2137/+}$  larvae ( $n=5/5$ ). Error bars represent the standard error. The scale bar represents 75  $\mu\text{m}$ . CHT, caudal hematopoietic tissue; dpf, days postfertilization.
