# Supplementary material
Source: PubMed Central journal article supplement (PMC3760052)
Supplement: Supp_Fig3.pdf [file Supp_Fig3.pdf]

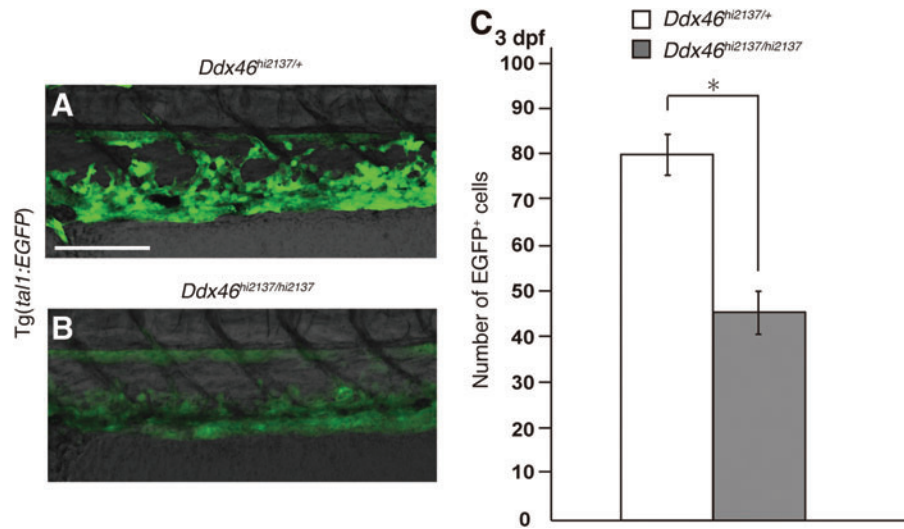

**SUPPLEMENTARY FIG. S3.** Expression of the *tal1:EGFP* transgene is markedly reduced in *Ddx46<sup>hi2137/hi2137</sup>;Tg(tal1:EGFP)* larvae. (**A, B**) Confocal microscopic images of EGFP fluorescence (green) of the CHT in *Ddx46<sup>hi2137/+</sup>;Tg(tal1:EGFP)* and *Ddx46<sup>hi2137/hi2137</sup>;Tg(tal1:EGFP)* larvae at 3 dpf. All are lateral views, anterior to the left. (**C**) The number of EGFP<sup>+</sup> cells in *Ddx46<sup>hi2137/hi2137</sup>;Tg(tal1:EGFP)* larvae (n=6/6) was significantly reduced compared with that in *Ddx46<sup>hi2137/+</sup>;Tg(tal1:EGFP)* larvae (n=5/5). \**P*<0.01 by the Student's *t*-test. Error bars represent the standard error. The scale bar represents 75 μm. *tal1*, T-cell acute lymphocytic leukemia 1.
