# Supplementary material
Source: PubMed Central journal article supplement (PMC3760052)
Supplement: Supp_Fig4.pdf [file Supp_Fig4.pdf]

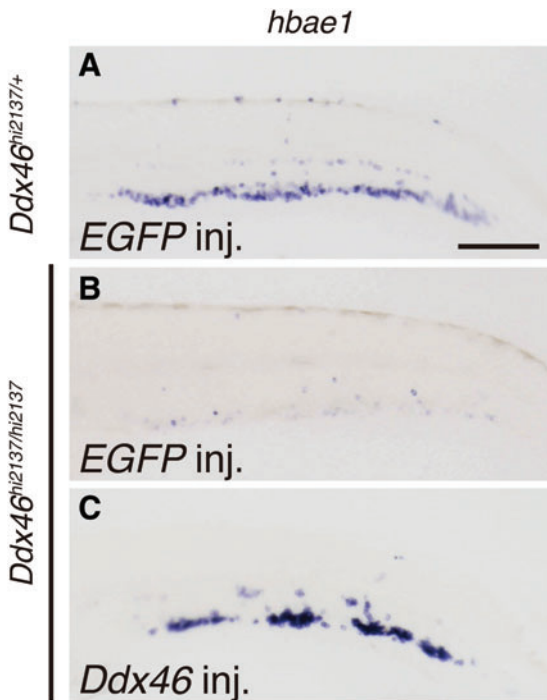

**SUPPLEMENTARY FIG. S4.** Expression of *hbae1* in *Ddx46*<sup>hi2137/hi2137</sup> mutants is rescued by *Ddx46* mRNA overexpression. (A–C) The expression of *hbae1* was examined by whole-mount in situ hybridization at 3 dpf. All are lateral views, anterior to the left. The expression of *hbae1* in the EGFP mRNA-injected *Ddx46*<sup>hi2137/hi2137</sup> larvae ( $n=14/14$ ) was markedly lower than that in the EGFP mRNA-injected *Ddx46*<sup>hi2137/+</sup> larvae ( $n=9/9$ ) at 3 dpf (A, B). The expression of *hbae1* in *Ddx46*<sup>hi2137/hi2137</sup> larvae was rescued by *Ddx46* mRNA overexpression at 3 dpf (13 of 13 *Ddx46* mRNA-injected mutants were rescued) (B, C). The scale bar represents 100  $\mu\text{m}$ . *hbae1*, hemoglobin alpha embryonic-1.
