# Supplementary material
Source: PubMed Central journal article supplement (PMC3760052)
Supplement: Supp_Fig5.pdf [file Supp_Fig5.pdf]

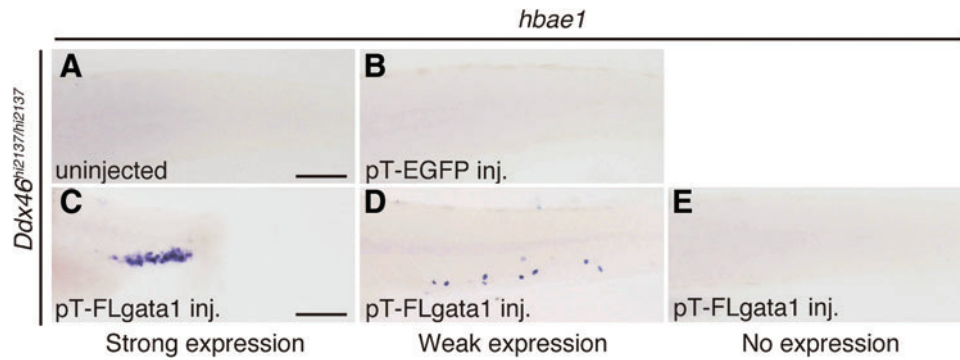

**SUPPLEMENTARY FIG. S5.** Expression of *hbae1* in *Ddx46<sup>hi2137/hi2137</sup>* mutants is rescued by the *Tol2-gata1a* vector. **(A–E)** The expression of *hbae1* was examined by whole-mount in situ hybridization at 3 dpf. All are lateral views, anterior to the left. **(A, B)** No staining of *hbae1* was observed in uninjected *Ddx46<sup>hi2137/hi2137</sup>* mutants ( $n=7/7$ ). The *hbae1* expression was not rescued by exogenous *EGFP* expression by using pT-EGFP in *Ddx46<sup>hi2137/hi2137</sup>* mutants (0 of 21 pT-EGFP + *Tol2*-transposase mRNA-injected mutants were rescued). **(C–E)** On the other hand, the *hbae1* expression was partially rescued by exogenous *gata1a* expression using pT-FLgata1 in *Ddx46<sup>hi2137/hi2137</sup>* mutants (strong *hbae1* expression, 6 of 39 pT-FLgata1 + *Tol2*-transposase mRNA-injected mutants were rescued; weak *hbae1* expression, 10 of 39 pT-FLgata1 + *Tol2*-transposase mRNA-injected mutants were rescued; no *hbae1* expression, 23 of 39 pT-FLgata1 + *Tol2*-transposase mRNA-injected mutants were not rescued). Scale bars represent 100  $\mu\text{m}$ .
